# Supplementary material
Source: PubMed Central journal article supplement (PMC7991658)
Supplement: 41419_2021_3513_MOESM2_ESM.pdf [file 41419_2021_3513_MOESM2_ESM.pdf]

| Gene   | Variant     | Gnomadv2.1 frequency | CADD  | Mutation significance cut-off 95% ( Itan et al, Nature methods 2016) |
|--------|-------------|----------------------|-------|----------------------------------------------------------------------|
| HECW1  | p.Asp828Glu | 0                    | 24,1  | 11,67                                                                |
| HECW2  | p.Pro134Ser | 0,001766609          | 22,1  | 27,11                                                                |
| HECW2  | p.Thr116Ile | 0,004761433          | 26,7  | 27,11                                                                |
| HECW2  | p.Val573Ile | 8,58882E-05          | 14,98 | 27,11                                                                |
| NEDD4  | p.Asp129Asn | 0,000294487          | 14,76 | 16,74                                                                |
| NEDD4  | p.Gly451Ala | 0,002257568          | 6,025 | 16,74                                                                |
| NEDD4  | p.Leu687Phe | 0,000627339          | 23,2  | 16,74                                                                |
| NEDD4  | p.Pro539del | 0,001141074          | 21,5  | 16,74                                                                |
| NEDD4  | p.Ile843Arg | 3,53689E-05          | 23,4  | 16,74                                                                |
| NEDD4  | p.Arg877Gln | 9,22483E-05          | 33    | 16,74                                                                |
| SMURF2 | p.Gly10Glu  | 0,003192598          | 13,29 | 28,65                                                                |
| WWP1   | p.Asn745Ser | 0,001614022          | 18,89 | 15,45                                                                |
| WWP2   | p.Lys620Asn | 0,000127496          | 26,6  | 13,9                                                                 |
