# Supplementary material
Source: PubMed Central journal article supplement (PMC7991658)
Supplement: 41419_2021_3513_MOESM3_ESM.pdf [file 41419_2021_3513_MOESM3_ESM.pdf]

| Gene   | SNP            | Gnomad AF | most_severe_consequence | Sift prediction            | Polyphen          | HGVSP       | Gender | Age  | Outcome  |
|--------|----------------|-----------|-------------------------|----------------------------|-------------------|-------------|--------|------|----------|
| HECW1  | chr7:43550491  | <0.01     | missense_variant        | deleterious                | possibly_damaging | T1432M      | M      | 77   | Survived |
| HECW1  | chr7:43456393  | <0.01     | missense_variant        | tolerated                  | benign            | P866L       | F      | 48   | Survived |
| NEDD4  | chr15:55916758 | <0.01     | missense_variant        | deleterious_low_confidence | possibly_damaging | D25G        | M      | 74   | Survived |
| NEDD4  | chr15:55833109 | <0.01     | splice_region_variant   |                            |                   | c.3688-5T>C | N.A.   | N.A. | N.A.     |
| NEDD4  | chr15:55951530 | <0.01     | missense_variant        | tolerated                  | benign            | Q60R        | F      | 77   | Survived |
| NEDD4L | chr18:58333891 | 0         | missense_variant        | tolerated                  | benign            | P355L       | M      | 63   | Survived |
| NEDD4L | chr18:58349550 | 0         | missense_variant        | tolerated                  | benign            | L530S       | F      | 62   | Survived |
| WWP2   | chr16:69842059 | <0.01     | missense_variant        | tolerated                  | benign            | A172P       | F      | 72   | Survived |
| WWP2   | chr16:69842128 | <0.01     | splice_region_variant   |                            |                   | c.575+8C>G  | M      | 24   | Survived |
