# Supplementary material
Source: PubMed Central journal article supplement (PMC7991658)
Supplement: 41419_2021_3513_MOESM7_ESM.pdf [file 41419_2021_3513_MOESM7_ESM.pdf]

# DECLARATION OF CONTRIBUTIONS TO ARTICLE

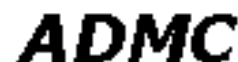

Manuscript Number:

**CDDIS-21-0402R**

Journal Name:

*Cell Death & Disease*

(the 'Journal')

Proposed Title of the Contribution:

**Inhibition of HECT E3 ligases as potential therapy for COVID-19**

(the 'Contribution')

Author(s):

**Giuseppe Novelli, Jing Liu, Michela Biancolella, Tonino Alonzi, Antonio Novelli, J.J. Patten, Dario**

(the 'Authors')

For all *CDDis* articles, each person named as an author in the published version must be able to show he or she has contributed substantially to the article.

Authorship credit should be based on 1) substantial contributions to conception and design, acquisition of data, or analysis and interpretation of data; 2) drafting the article or revising it critically for important intellectual content; and 3) final approval of the version to be published. Authors should meet conditions 1, 2 and 3.

Any person who cannot be shown to have made a substantial contribution to the article cannot be listed as an author in the final version. The name of any person who is deemed to have made a minor contribution can, however, appear in the Acknowledgments section of the article.

Please complete the table below to indicate the contributions of all named authors to the manuscript.

| Author Full Name:                                                                    | Specification of Contribution to the Manuscript:                                           |
|--------------------------------------------------------------------------------------|--------------------------------------------------------------------------------------------|
| G. Novelli; P. P. Pandolfi                                                           | Wrote the draft of the paper in particular genetics section, and                           |
| J. Liu; W. Wei                                                                       | Description of the functional studies using HECT proteins                                  |
| J- L.Casanova; L. Abel; A.Cobat                                                      | Wrote the section of the analysis and interpretation of genetic data                       |
| J.J.Grzymiski; G.Elhanan                                                             | Genetic Analysis and interpretation of genetic data                                        |
| M. Biancolella; B. Rizzacasa; S. Grelli                                              | Performed RNA expression analysis and statistical tests and described the specific section |
| T. Alonzi; M.R. Capobianchi; D. Goletti; J.J. Patten; R.A. Davey                     | Provided in vivo SARS-CoV-2 assays and inhibition tests                                    |
| K.Cheng; J.Mann; T. D. McKee; F. Krammer; F.Amanat                                   | Performed histological analysis in human lung tissue and in                                |
| G. Pepe; A. Guarracino                                                               | In silico analysis of structural proteins                                                  |
| H.C. Su; L.D. Notarangelo                                                            | Genetic data Analysis; Review of the draft                                                 |
| Y.T.Lambiotte; Y. Uzunhan; S. Tubiana; J.Ghosn                                       | Provided clinical data                                                                     |
| A. Novelli; D.Cocciadiferro; E. Agolini; B. Bigio; V.L.Colona; R.Giannini; A. Latini | WES Analysis, genetic study and clinical correlation                                       |
| C. Tomino; S. Jain; S.Sidhu                                                          | I3C chemical study, biochemical analysis                                                   |
|                                                                                      |                                                                                            |

Please complete the table below to indicate the contributions of all named authors to the figures.

Figure 1:

Wenyi Wei; Jing Liu

Figure 2:

Michela Biancolella; Barbara Rizzacasa; Sandro Grelli

Figure 3:

Justin Mann, Trevor D. McKee, Ke Cheng

Figure 4:

Andrea Guarracino, Gerardo Pepe

Figure 5:

Wenyi Wei; Jing Liu; Pier Paolo Pandolfi

Figure 6:

Delia Goletti, Maria Rosaria Capobianchi; Tonino Alonzi

Signed for and on behalf of the Author(s):



Print Name:

Giuseppe Novelli

Date:

February, 5, 2021
